# Supplementary material for: Perinatal and maternal morbidity and mortality among term singletons following midcavity operative vaginal delivery versus caesarean delivery
Source: PubMed Central journal article supplement — BJOG. 2017 Aug 21;125(6):693–702. doi: 10.1111/1471-0528.14820 (PMC5947834; doi:10.1111/1471-0528.14820), 2017-08-21
Supplement: BJO-125-693-s001.pdf [file BJO-125-693-s001.pdf]

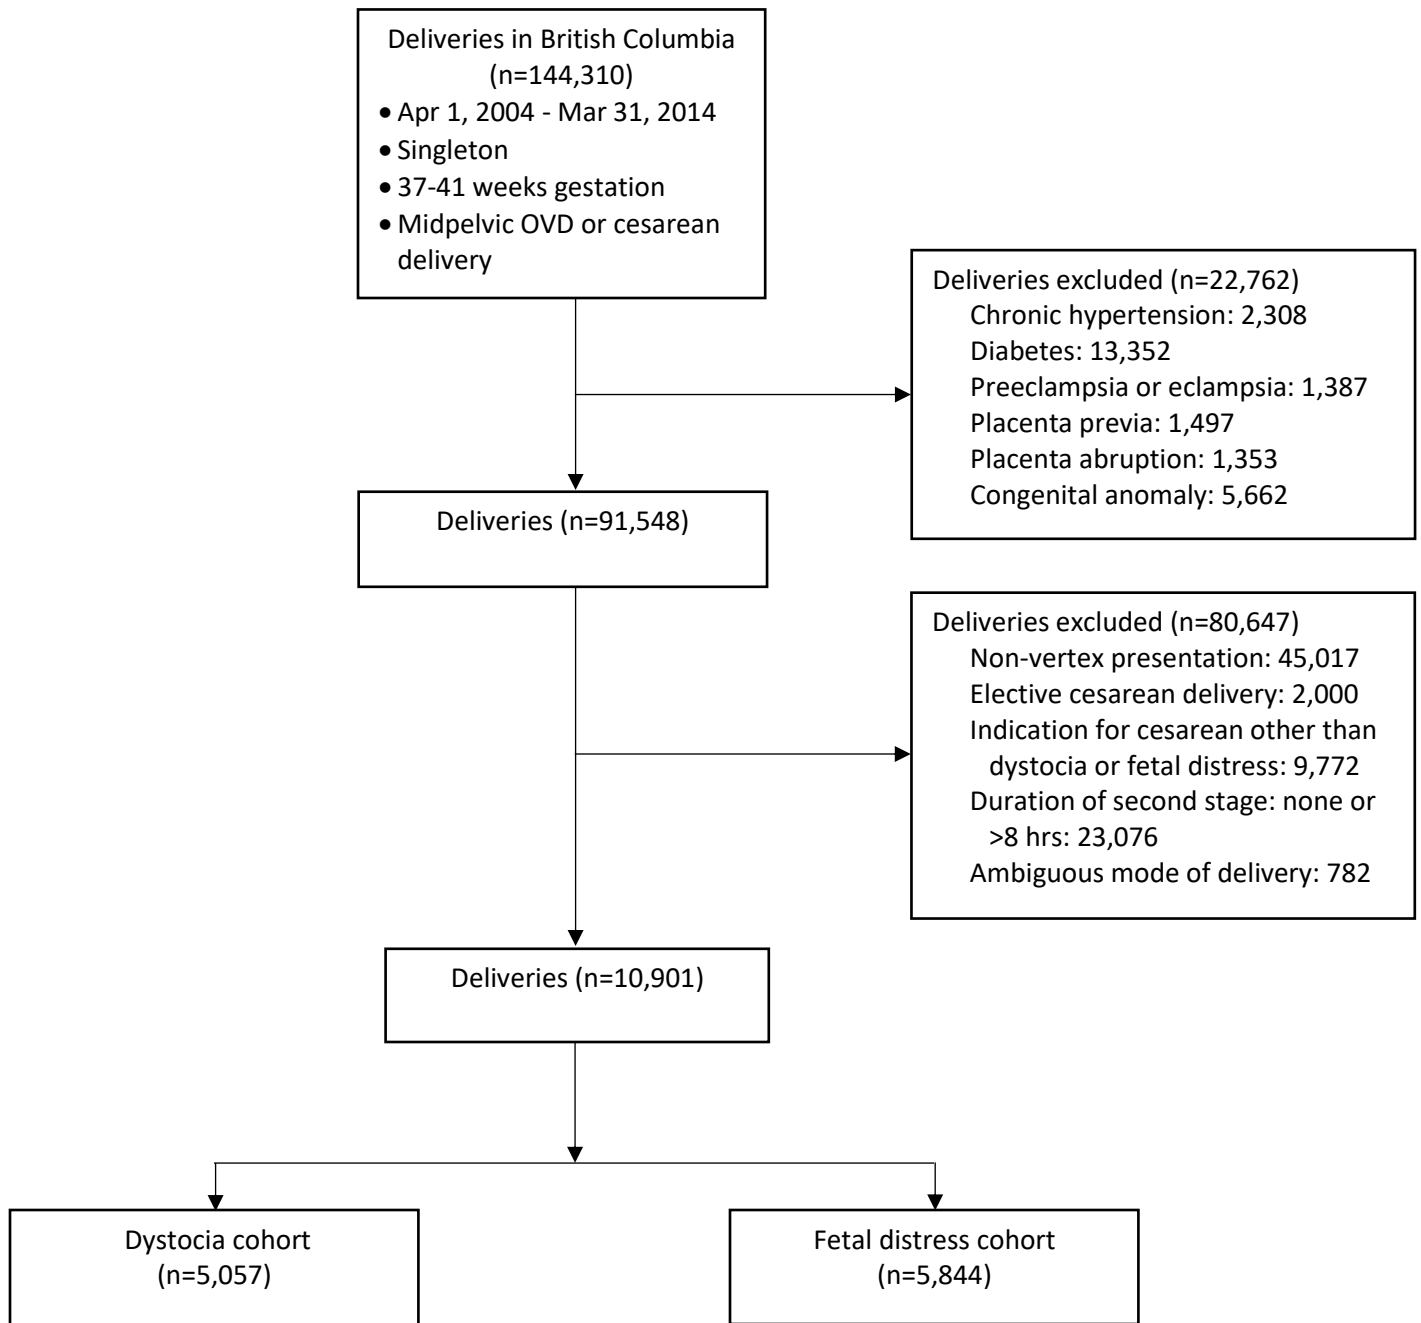

**Figure S1.** Derivation of study cohort.

\*The sum of individual exclusions may exceed the total at each point as a result of deliveries being excluded for multiple reasons.
