# Supplementary material for: Perinatal and maternal morbidity and mortality among term singletons following midcavity operative vaginal delivery versus caesarean delivery
Source: PubMed Central journal article supplement — BJOG. 2017 Aug 21;125(6):693–702. doi: 10.1111/1471-0528.14820 (PMC5947834; doi:10.1111/1471-0528.14820), 2017-08-21
Supplement: BJO-125-693-s002.pdf [file BJO-125-693-s002.pdf]

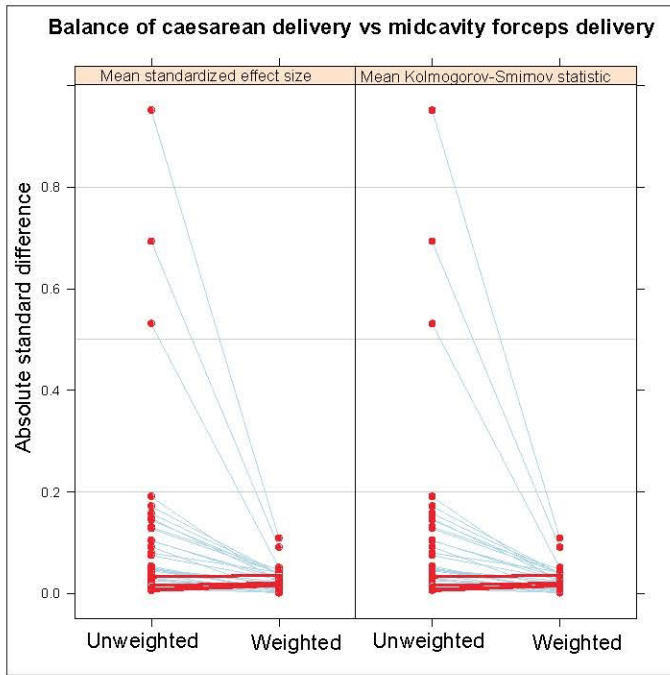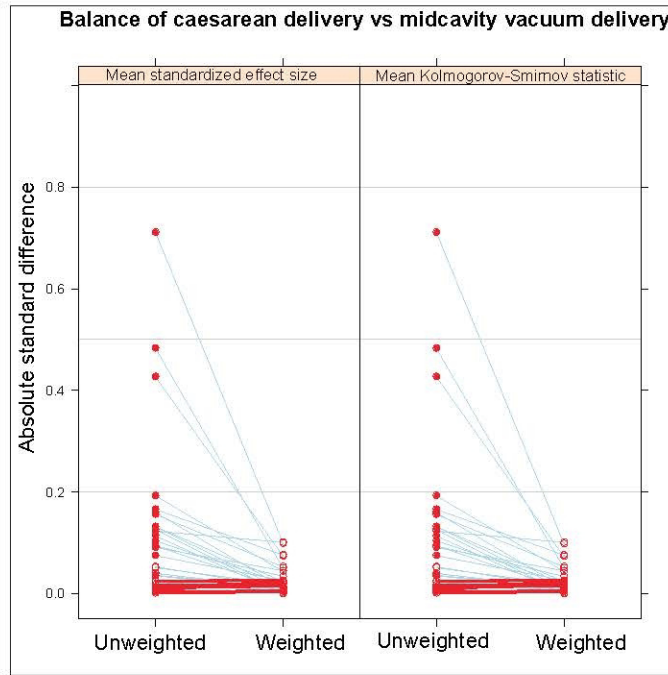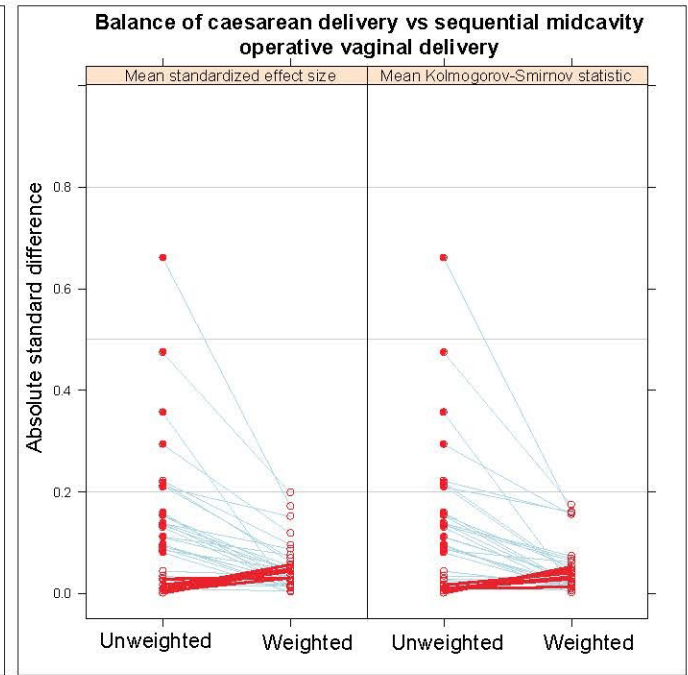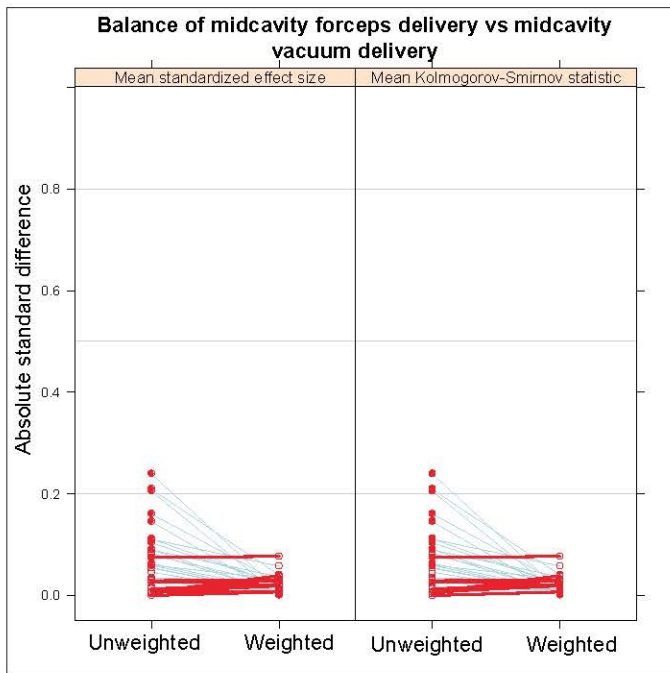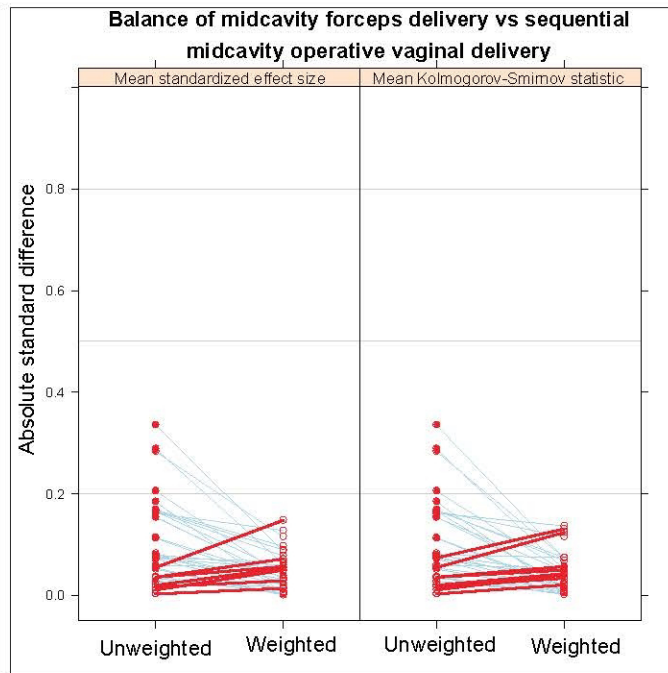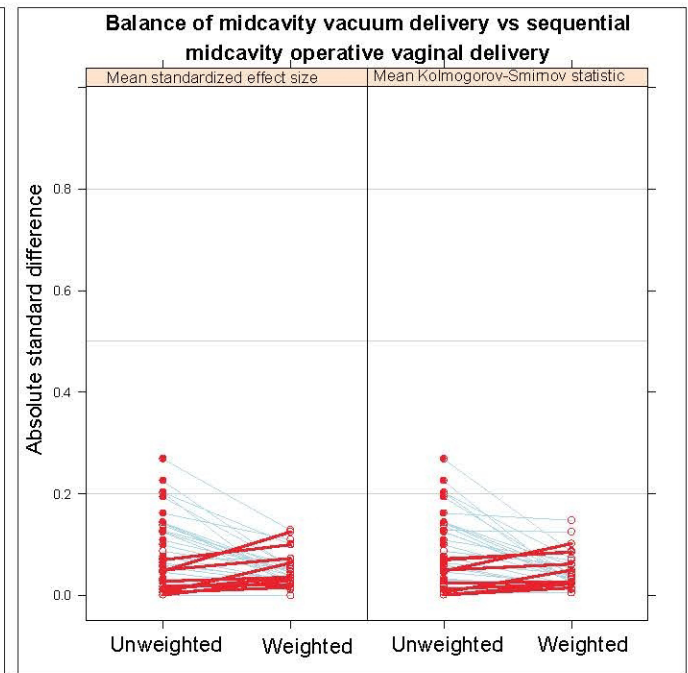

**Figure S2.** Unweighted and weighted effect size plots for the dystocia cohort. These plots compare the absolute standardized mean differences between the mode of delivery groups on the study covariates, before and after weighting. Absolute standardized mean differences of  $<0.20$  in the weighted groups indicate good balance. A statistically significant absolute standardized difference between the weighted and unweighted values is indicated by the solid circle.
