# Supplementary material for: Perinatal and maternal morbidity and mortality among term singletons following midcavity operative vaginal delivery versus caesarean delivery
Source: PubMed Central journal article supplement — BJOG. 2017 Aug 21;125(6):693–702. doi: 10.1111/1471-0528.14820 (PMC5947834; doi:10.1111/1471-0528.14820), 2017-08-21
Supplement: BJO-125-693-s004.pdf [file BJO-125-693-s004.pdf]

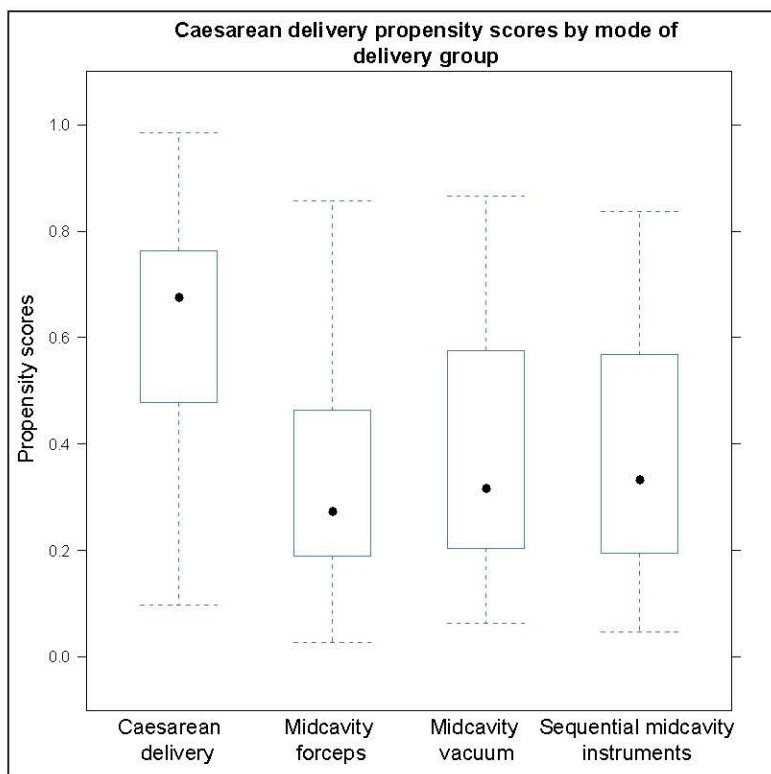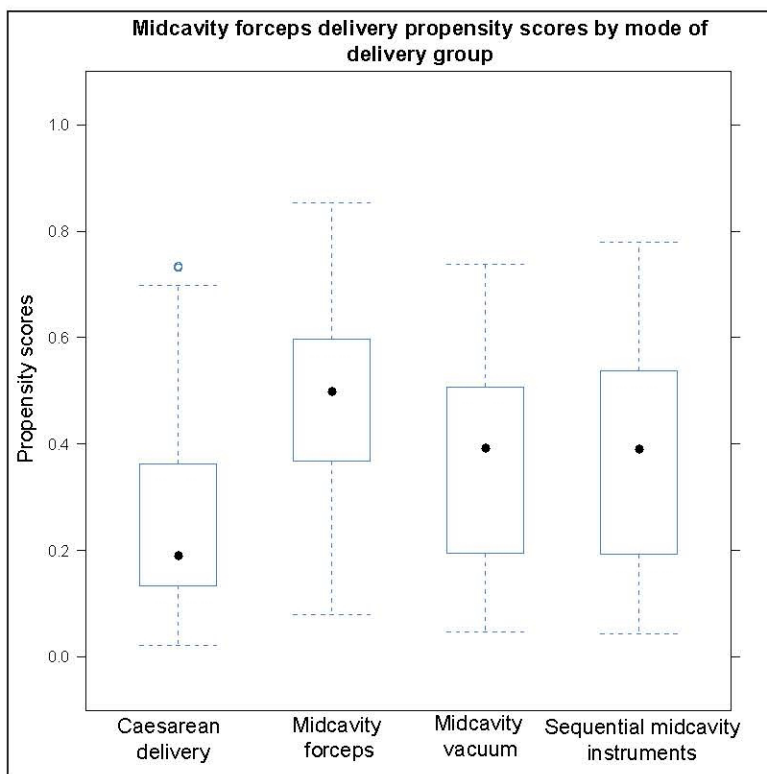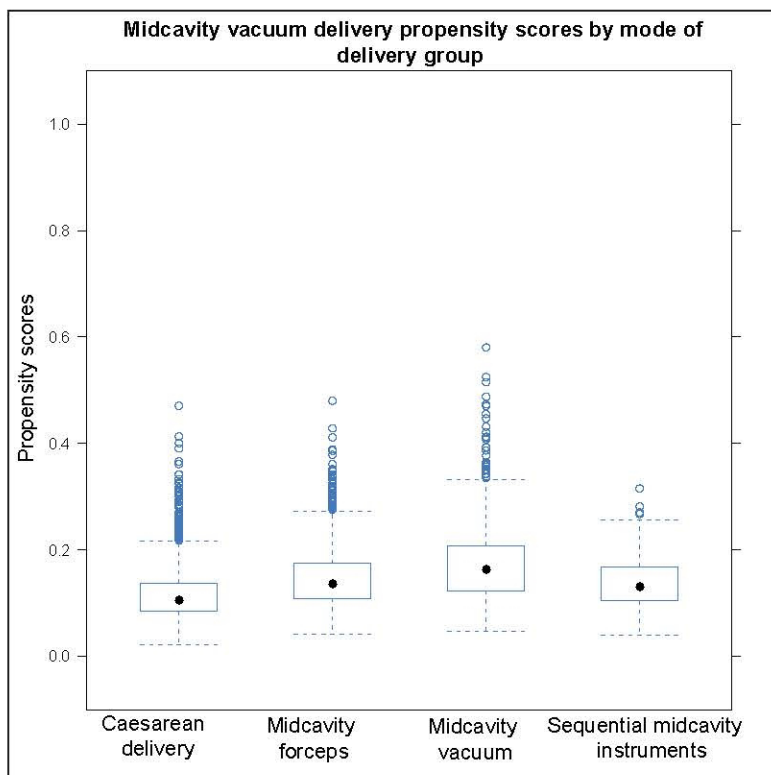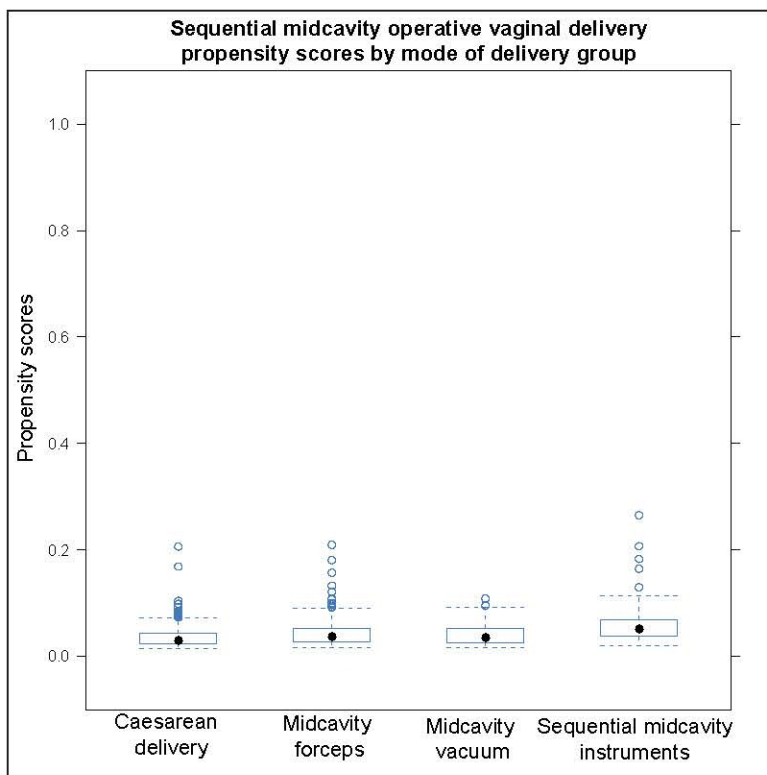

**Figure S4.** Overlap assessment. Each panel presents box plots by treatment group of the estimated propensity scores for one of the mode of delivery groups in the dystocia cohort.
