# Supplementary material for: Perinatal and maternal morbidity and mortality among term singletons following midcavity operative vaginal delivery versus caesarean delivery
Source: PubMed Central journal article supplement — BJOG. 2017 Aug 21;125(6):693–702. doi: 10.1111/1471-0528.14820 (PMC5947834; doi:10.1111/1471-0528.14820), 2017-08-21
Supplement: BJO-125-693-s006.pdf [file BJO-125-693-s006.pdf]

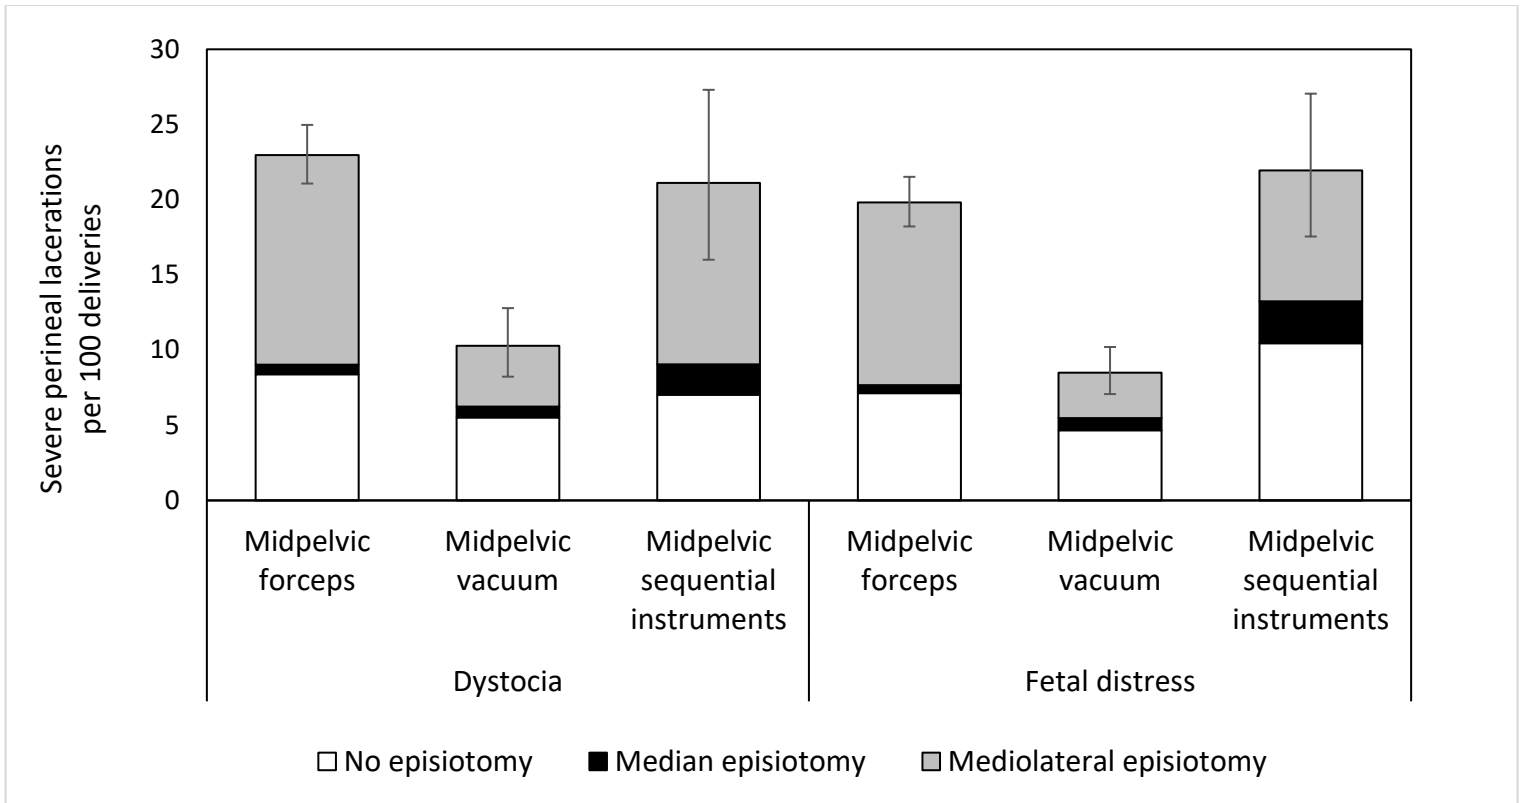

**Figure S6.** Rates (per 100 deliveries) and 95% confidence intervals of third and fourth-degree perineal lacerations following midpelvic operative vaginal delivery by instrument, indication, and type of episiotomy, British Columbia, 2004–2014.
