# Supplementary material for: Perinatal and maternal morbidity and mortality among term singletons following midcavity operative vaginal delivery versus caesarean delivery
Source: PubMed Central journal article supplement — BJOG. 2017 Aug 21;125(6):693–702. doi: 10.1111/1471-0528.14820 (PMC5947834; doi:10.1111/1471-0528.14820), 2017-08-21
Supplement: BJO-125-693-s008.pdf [file BJO-125-693-s008.pdf]

## Supplementary material

Table S1. International Classification of Diseases and Related Health Problems Tenth Revision, Canadian version (ICD-10-CA), and Canadian Classification of Health Interventions (CCI) codes used for population selection and to classify determinants, outcomes, and confounders

| <b>Diagnosis/Procedure</b>                     | <b>ICD-10-CA</b>   | <b>CCI</b>                                                                                                                                                                          | <b>Study use</b>   |
|------------------------------------------------|--------------------|-------------------------------------------------------------------------------------------------------------------------------------------------------------------------------------|--------------------|
| Single live birth                              | BCPDR data element |                                                                                                                                                                                     |                    |
| Midcavity forceps delivery                     |                    | 5.MD.53                                                                                                                                                                             |                    |
| Midcavity vacuum delivery                      |                    | 5.MD.54                                                                                                                                                                             |                    |
| Midcavity sequential instrumental delivery     |                    | 5.MD.55                                                                                                                                                                             |                    |
| Failed forceps delivery                        |                    |                                                                                                                                                                                     |                    |
| Failed instrument                              | O66.5              |                                                                                                                                                                                     |                    |
| Caesarean delivery with forceps                |                    | 5.MD.60.RC, 5.MD.60.JZ, 5.MD.60.KC, 5.MD.60.RA, 5.MD.60.RE, 5.MD.60.JW, 5.MD.60.RG                                                                                                  |                    |
| Failed vacuum delivery                         |                    |                                                                                                                                                                                     |                    |
| Failed instrument                              | O66.5              |                                                                                                                                                                                     |                    |
| Caesarean delivery with vacuum                 |                    | 5.MD.60.RD, 5.MD.60.KA, 5.MD.60.KD, 5.MD.60.RB, 5.MD.60.RF, 5.MD.60.JX, 5.MD.60.RH                                                                                                  | Inclusion criteria |
| Failed sequential instrumental delivery        |                    |                                                                                                                                                                                     |                    |
| Failed instrument                              | O66.5              |                                                                                                                                                                                     |                    |
| Caesarean delivery with sequential instruments |                    | 5.MD.60.C                                                                                                                                                                           |                    |
| Caesarean delivery in second stage of labour   |                    | 5.MD.60.KE, 5.MD.60.JY, 5.MD.60.KB, 5.MD.60.KG, 5.MD.60.KF, 5.MD.60.AA, 5.MD.60.KT + BCPDR element for duration of second stage of labour (only deliveries with value > 0 included) |                    |
| Gestational age 37–41 weeks                    | BCPDR data element |                                                                                                                                                                                     |                    |
| Therapeutic abortions                          | O04                | 5.CA.20, 5.CA.24, 5.CA.88, 5.CA.89, 5.CA.90                                                                                                                                         |                    |
| Non-vertex presentation                        | O32.1, O64.1       | 5.MD.56 + BCPDR indicator variable for baby presentation during labour                                                                                                              |                    |
| Chronic hypertension                           | O10, O11           |                                                                                                                                                                                     | Exclusion criteria |
| Preeclampsia                                   | O14                |                                                                                                                                                                                     |                    |
| Eclampsia                                      | O15                |                                                                                                                                                                                     |                    |
| Diabetes                                       | O24                |                                                                                                                                                                                     |                    |
| Placenta praevia                               | O44                |                                                                                                                                                                                     |                    |
| Placental abruption                            | O45                |                                                                                                                                                                                     |                    |
| Congenital anomalies                           | Q                  |                                                                                                                                                                                     |                    |

Table S1 (cont'd). International Classification of Diseases and Related Health Problems Tenth Revision, Canadian version (ICD-10-CA), and Canadian Classification of Health Interventions (CCI) codes used for population selection and to classify determinants, outcomes, and confounders

| <b>Diagnosis/Procedure</b>                                   | <b>ICD-10-CA</b>                                                                                     | <b>CCI</b>             | <b>Study use</b>                      |
|--------------------------------------------------------------|------------------------------------------------------------------------------------------------------|------------------------|---------------------------------------|
| Dystocia                                                     | O32, O33, O34.0, O34.1, O34.3–O34.9, O62.0, O62.1, O62.2, O62.4, O62.8, O62.9, O63, O66              |                        | Cohort definition                     |
| Fetal distress                                               | O68, O69.0                                                                                           |                        |                                       |
| Maternal age                                                 | BCPDR element                                                                                        |                        |                                       |
| Parity                                                       | BCPDR element                                                                                        |                        |                                       |
| Pre-pregnancy weight                                         | BCPDR element                                                                                        |                        |                                       |
| Previous caesarean delivery                                  | O34.20, O66.40, O75.7                                                                                |                        | Potential confounder/ effect modifier |
| Birth weight                                                 | BCPDR element                                                                                        |                        |                                       |
| Fiscal year                                                  | BCPDR element                                                                                        |                        |                                       |
| Practitioner                                                 | BCPDR element                                                                                        |                        |                                       |
| Prolonged second stage                                       | O63.1                                                                                                |                        |                                       |
| Position of the fetal head                                   | BCPDR element                                                                                        |                        |                                       |
| Stillbirth                                                   | BCPDR element                                                                                        |                        |                                       |
| Neonatal death                                               | BCPDR element                                                                                        |                        |                                       |
| Neonatal convulsions                                         | P90                                                                                                  |                        |                                       |
| Assisted ventilation by endotracheal intubation              | BCPDR element                                                                                        | 1.GZ.31.CA-ND          | Primary perinatal composite outcome   |
| 5-minute Apgar < 4                                           | BCPDR element                                                                                        |                        |                                       |
| Severe birth trauma                                          | P10, P11.0–P11.2, P11.4–P11.5 P12.2, P13.0, P13.2, P13.30, P13.38, P14.0, P14.1, P14.3, P15.0, P15.1 |                        |                                       |
| Respiratory distress                                         | P22                                                                                                  |                        | Secondary perinatal outcome           |
| Severe postpartum haemorrhage                                | O72 + BCPDR element (blood transfusion indicator variable)                                           |                        |                                       |
| Shock                                                        | O75.1, T80.5, T886, R57                                                                              |                        | Primary maternal composite outcome    |
| Sepsis                                                       | O85                                                                                                  |                        |                                       |
| Cardiac complications                                        | O89.1, O74.2, O75.4, I21, I22, I46, I50, J81                                                         |                        |                                       |
| Acute renal failure                                          | O90.4, N99.0, N17, N19                                                                               |                        |                                       |
| Obstetric embolism                                           | O88                                                                                                  |                        |                                       |
| Obstetric trauma                                             | O70.2, O70.3, O71.3–O71.9                                                                            | 5.PC.80.JQ, 5.PC.80.JH |                                       |
| 3 <sup>rd</sup> /4 <sup>th</sup> degree perineal lacerations | O70.2, O70.3 + BCPDR element                                                                         | 5.PC.80.JQ             |                                       |
| Postpartum haemorrhage                                       | O72                                                                                                  |                        | Secondary maternal outcome            |
| Postpartum haemorrhage – retained placenta                   | O72.0                                                                                                |                        |                                       |
| Postpartum haemorrhage – atonic                              | O72.1                                                                                                |                        |                                       |
| Postpartum haemorrhage – delayed                             | O72.2                                                                                                |                        |                                       |

Table S2. Numbers and rates of all components of perinatal and maternal outcomes by attempted mode of delivery, British Columbia, 2004–2014

| Outcome                                                              | Caesarean delivery |       | Midcavity forceps |       | Midcavity vacuum |       | Sequential midcavity OVD |       |
|----------------------------------------------------------------------|--------------------|-------|-------------------|-------|------------------|-------|--------------------------|-------|
|                                                                      | n                  | %     | n                 | %     | n                | %     | n                        | %     |
| <b>Dystocia</b>                                                      |                    |       |                   |       |                  |       |                          |       |
| Severe perinatal morbidity/mortality                                 | 20                 | 0.83  | 30                | 1.70  | 15               | 2.17  | 7                        | 3.52  |
| Stillbirth <sup>a</sup>                                              | <5                 | <0.21 | <5                | <0.28 | 0                | 0.00  | 0                        | 0.00  |
| Neonatal death                                                       | 0                  | 0.00  | 0                 | 0.00  | 0                | 0.00  | <5                       | <2.51 |
| Convulsions                                                          | <5                 | <0.21 | <5                | <0.28 | <5               | <0.72 | 0                        | 0.00  |
| Assisted ventilation by endotracheal tube                            | 6                  | 0.25  | 9                 | 0.51  | <5               | <0.72 | <5                       | <2.51 |
| 5-min Apgar <4                                                       | 7                  | 0.29  | 6                 | 0.34  | <5               | <0.72 | 0                        | 0.00  |
| Severe birth trauma <sup>b</sup>                                     | 7                  | 0.29  | 17                | 0.96  | 7                | 1.01  | <5                       | <2.51 |
| Respiratory distress <sup>c</sup>                                    | 60                 | 1.49  | 64                | 3.63  | 33               | 4.78  | 9                        | 4.52  |
| Birth trauma                                                         | 28                 | 1.16  | 71                | 4.03  | 53               | 7.68  | 23                       | 11.6  |
| Severe maternal morbidity                                            | 19                 | 0.79  | 21                | 1.19  | 10               | 1.45  | <5                       | <2.51 |
| Severe postpartum haemorrhage <sup>d</sup>                           | 12                 | 0.50  | 17                | 0.96  | 9                | 1.30  | <5                       | <2.51 |
| Shock                                                                | <5                 | <0.21 | <5                | <0.28 | 0                | 0.00  | 0                        | 0.00  |
| Sepsis                                                               | 5                  | 0.21  | <5                | <0.28 | 0                | 0.00  | <5                       | <2.51 |
| Obstetric embolism                                                   | <5                 | <0.21 | 0                 | 0.00  | <5               | <0.72 | 0                        | 0.00  |
| Cardiac complication <sup>e</sup>                                    | <5                 | <0.21 | <5                | <0.28 | 0                | 0.00  | 0                        | 0.00  |
| Acute renal failure                                                  | 0                  | 0.00  | 0                 | 0.00  | 0                | 0.00  | 0                        | 0.00  |
| Postpartum haemorrhage <sup>f</sup>                                  | 111                | 4.62  | 374               | 21.2  | 96               | 13.9  | 35                       | 17.6  |
| Obstetric trauma <sup>g</sup>                                        | 92                 | 3.83  | 465               | 26.4  | 80               | 11.6  | 45                       | 22.6  |
| Severe perineal laceration (3 <sup>rd</sup> /4 <sup>th</sup> degree) | 0                  | 0.00  | 405               | 23.0  | 71               | 10.3  | 42                       | 21.1  |
| <b>Fetal distress</b>                                                |                    |       |                   |       |                  |       |                          |       |
| Severe perinatal morbidity/mortality                                 | 40                 | 1.89  | 59                | 2.66  | 32               | 2.62  | 6                        | 2.09  |
| Stillbirth <sup>a</sup>                                              | 0                  | 0.00  | <5                | <0.23 | 0                | 0.00  | 0                        | 0.00  |
| Neonatal death                                                       | 0                  | 0.00  | <5                | <0.23 | 0                | 0.00  | 0                        | 0.00  |
| Convulsions                                                          | 9                  | 0.42  | 7                 | 0.32  | 6                | 0.49  | <5                       | <1.74 |
| Assisted ventilation by endotracheal tube                            | 24                 | 1.13  | 24                | 1.08  | 19               | 1.55  | <5                       | <1.74 |
| 5-min Apgar <4                                                       | 7                  | 0.33  | 7                 | 0.32  | 6                | 0.49  | <5                       | <1.74 |
| Severe birth trauma <sup>b</sup>                                     | 5                  | 0.24  | 25                | 1.13  | 8                | 0.65  | <5                       | <1.74 |
| Respiratory distress <sup>c</sup>                                    | 151                | 7.13  | 162               | 7.31  | 81               | 6.62  | 26                       | 9.06  |
| Birth trauma                                                         | 39                 | 1.84  | 98                | 4.42  | 65               | 5.31  | 27                       | 9.41  |
| Severe maternal morbidity                                            | 14                 | 0.66  | 34                | 1.53  | 7                | 0.57  | 5                        | 1.74  |
| Severe postpartum haemorrhage <sup>d</sup>                           | 7                  | 0.33  | 29                | 1.31  | <5               | <0.41 | <5                       | <1.74 |
| Shock                                                                | <5                 | <0.24 | 0                 | 0.00  | 0                | 0.00  | 0                        | 0.00  |
| Sepsis                                                               | <5                 | <0.24 | <5                | <0.23 | <5               | <0.41 | <5                       | <1.74 |
| Obstetric embolism                                                   | 0                  | 0.00  | 0                 | 0.00  | <5               | <0.41 | 0                        | 0.00  |
| Cardiac complication <sup>e</sup>                                    | <5                 | <0.24 | <5                | <0.23 | 0                | 0.00  | 0                        | 0.00  |
| Acute renal failure                                                  | <5                 | <0.24 | 0                 | 0.00  | 0                | 0.00  | 0                        | 0.00  |
| Postpartum haemorrhage <sup>f</sup>                                  | 107                | 5.05  | 438               | 19.8  | 151              | 12.4  | 51                       | 17.8  |
| Obstetric trauma <sup>g</sup>                                        | 101                | 4.77  | 535               | 24.2  | 121              | 9.89  | 74                       | 25.8  |
| Severe perineal laceration (3 <sup>rd</sup> /4 <sup>th</sup> degree) | 0                  | 0.00  | 439               | 19.8  | 104              | 8.50  | 63                       | 22.0  |

OVD, operative vaginal delivery.

a Only stillbirths that occurred after the onset of labour were included.

b Severe birth trauma included intracranial laceration and haemorrhage, skull fracture, severe injury to CNS, severe injury to PNS, long bone injury, subaponeurotic haemorrhage, injury to liver, and injury to spleen.

c Respiratory distress included RDS (hyaline membrane disease, idiopathic respiratory distress syndrome) and transient tachypnoea of the newborn and other neonatal respiratory distress.

d Severe postpartum haemorrhage includes postpartum haemorrhage requiring transfusion.

e Cardiac complications included cardiac arrest, cardiac failure, myocardial infarction and pulmonary embolism.

f Postpartum haemorrhage (PPH) included atonic PPH, 3rd stage PPH, delayed PPH, and PPH due to coagulation defects.

g Obstetric trauma included 3rd/4th degree perineal laceration, cervical laceration, uterine rupture during labour, high vaginal laceration, other obstetric injury to pelvic organs, and obstetric damage to pelvic joints and ligaments.

Table S3. Rate ratios expressing the association between operative vaginal delivery (OVD) vs caesarean delivery and severe perinatal and maternal morbidity/mortality among women with dystocia and fetal distress with adjustment using multivariable logistic regression, British Columbia, 2004–2014

| Outcome                                           | Caesarean delivery | Attempted midcavity forceps | Attempted midcavity vacuum | Attempted sequential midcavity OVD |
|---------------------------------------------------|--------------------|-----------------------------|----------------------------|------------------------------------|
|                                                   | ARR (95% CI)       | ARR (95% CI)                | ARR (95% CI)               | ARR (95% CI)                       |
| <b>Dystocia cohort</b>                            |                    |                             |                            |                                    |
| Severe perinatal morbidity/mortality <sup>a</sup> | Reference          | 2.32 (1.24-4.36)            | 2.94 (1.43-6.05)           | 4.80 (1.92-12.0)                   |
| Severe maternal morbidity <sup>b</sup>            | Reference          | 1.79 (0.89-3.60)            | 2.01 (0.89-4.54)           | 1.59 (0.35-7.16)                   |
| <b>Fetal distress cohort</b>                      |                    |                             |                            |                                    |
| Severe perinatal morbidity/mortality <sup>a</sup> | Reference          | 1.56 (1.00-2.45)            | 1.43 (0.85-2.42)           | 1.15 (0.47-2.81)                   |
| Severe maternal morbidity <sup>b</sup>            | Reference          | 2.04 (1.01-4.14)            | 0.80 (0.30-2.17)           | 2.62 (0.89-7.74)                   |

ARR, adjusted rate ratio; CI, confidence interval.

Results adjusted for maternal age, parity, pre-pregnancy weight, previous caesarean delivery, position of the fetal head at delivery, birth weight, income quintile, and year of delivery.

a Severe perinatal morbidity/mortality included neonatal convulsions, assisted ventilation by endotracheal tube, 5-minute Apgar score of <4, severe birth trauma (see below for definition), stillbirth that occurred after the onset of labour, and neonatal death.

b Severe maternal morbidity included severe postpartum haemorrhage, shock, sepsis, obstetric embolism, cardiac complication, and acute renal failure.

Table S4. Rate ratios expressing the association between operative vaginal delivery (OVD) vs caesarean delivery and severe perinatal and maternal morbidity/mortality among women with dystocia and fetal distress with adjustment using regression with propensity score weights and doubly robust estimators, British Columbia, 2004–2014

| Outcome                                           | Caesarean delivery | Attempted midcavity forceps | Attempted midcavity vacuum | Attempted sequential midcavity OVD |
|---------------------------------------------------|--------------------|-----------------------------|----------------------------|------------------------------------|
|                                                   | ARR (95% CI)       | ARR (95% CI)                | ARR (95% CI)               | ARR (95% CI)                       |
| <b>Dystocia cohort</b>                            |                    |                             |                            |                                    |
| Severe perinatal morbidity/mortality <sup>a</sup> | Reference          | 2.26 (1.54-3.32)            | 2.36 (1.60-3.47)           | 5.07 (3.54-7.25)                   |
| Severe maternal morbidity <sup>b</sup>            | Reference          | 1.72 (1.13-2.61)            | 2.44 (1.65-3.62)           | 1.68 (1.08-2.60)                   |
| <b>Fetal distress cohort</b>                      |                    |                             |                            |                                    |
| Severe perinatal morbidity/mortality <sup>a</sup> | Reference          | 1.20 (0.94-1.53)            | 1.36 (1.06-1.74)           | 1.02 (0.77-1.36)                   |
| Severe maternal morbidity <sup>b</sup>            | Reference          | 2.41 (1.58-3.68)            | 0.79 (0.46-1.36)           | 3.26 (2.11-5.02)                   |

ARR, adjusted rate ratio; CI, confidence interval.

Results adjusted for maternal age, parity, pre-pregnancy weight, previous caesarean delivery, position of the fetal head at delivery, birth weight, income quintile, and year of delivery.

a Severe perinatal morbidity/mortality included neonatal convulsions, assisted ventilation by endotracheal tube, 5-minute Apgar score of <4, severe birth trauma (see below for definition), stillbirth that occurred after the onset of labour, and neonatal death.

b Severe maternal morbidity included severe postpartum haemorrhage, shock, sepsis, obstetric embolism, cardiac complication, and acute renal failure.

Table S5. Adjusted rate ratios (ARR) and 95% confidence intervals (CI) for severe perinatal and maternal composite morbidity and mortality following deliveries by attempted midcavity operative vaginal delivery compared with caesarean delivery, stratified by position of fetal head at delivery, British Columbia, 2004–2014

| Outcome                                                                         | Attempted midcavity instrument(s) | Anterior                               |             |             | Posterior/Transverse                   |      |             | P-value for interaction |             |             |
|---------------------------------------------------------------------------------|-----------------------------------|----------------------------------------|-------------|-------------|----------------------------------------|------|-------------|-------------------------|-------------|-------------|
|                                                                                 |                                   | Outcome rate in caesarean delivery (%) | ARR         | 95% CI      | Outcome rate in caesarean delivery (%) | ARR  | 95% CI      |                         |             |             |
| <b>Dystocia</b>                                                                 |                                   |                                        |             |             |                                        |      |             |                         |             |             |
| Severe perinatal morbidity/mortality                                            | Forceps                           |                                        | 1.65        | 0.78        | 3.52                                   |      | 3.14        | 1.03                    | 10.44       | 0.18        |
|                                                                                 | Vacuum                            | 1.46                                   | 1.94        | 0.79        | 4.79                                   | 0.73 | 5.40        | 1.57                    | 18.61       | 0.14        |
|                                                                                 | Sequential                        |                                        | 4.08        | 1.34        | 12.43                                  |      | 5.86        | 0.81                    | 42.39       | 0.63        |
| Severe maternal morbidity                                                       | Forceps                           |                                        | 2.11        | 0.72        | 6.18                                   |      | 1.84        | 0.52                    | 6.52        | 0.79        |
|                                                                                 | Vacuum                            | 0.65                                   | 2.28        | 0.66        | 7.88                                   | 1.09 | 2.51        | 0.69                    | 9.13        | 0.86        |
|                                                                                 | Sequential                        |                                        | 1.34        | 0.15        | 12.24                                  |      | 2.40        | 0.30                    | 19.34       | 0.78        |
| Severe perineal lacerations (3 <sup>rd</sup> /4 <sup>th</sup> deg) <sup>a</sup> | Forceps                           |                                        | 21.6        | 19.4        | 24.0                                   |      | 36.7        | 30.1                    | 43.8        | -           |
|                                                                                 | Vacuum                            | 0.00                                   | 11.5        | 8.77        | 15.0                                   | 0.00 | 4.88        | 2.25                    | 10.2        | -           |
|                                                                                 | Sequential                        |                                        | 23.9        | 17.0        | 32.5                                   |      | 22.7        | 12.8                    | 37.0        | -           |
| <b>Fetal distress</b>                                                           |                                   |                                        |             |             |                                        |      |             |                         |             |             |
| Severe perinatal morbidity/mortality                                            | Forceps                           |                                        | 1.27        | 0.69        | 2.34                                   |      | 1.29        | 0.46                    | 3.65        | 0.87        |
|                                                                                 | Vacuum                            | 2.46                                   | <b>0.97</b> | <b>0.48</b> | <b>1.96</b>                            | 1.61 | <b>3.00</b> | <b>1.28</b>             | <b>7.01</b> | <b>0.03</b> |
|                                                                                 | Sequential                        |                                        | 0.75        | 0.24        | 2.36                                   |      | 2.09        | 0.47                    | 9.27        | 0.15        |
| Severe maternal morbidity                                                       | Forceps                           |                                        | 3.73        | 1.05        | 13.18                                  |      | 1.40        | 0.39                    | 5.06        | 0.21        |
|                                                                                 | Vacuum                            | 0.45                                   | 1.34        | 0.31        | 5.70                                   | 0.99 | 0.72        | 0.09                    | 5.69        | 0.52        |
|                                                                                 | Sequential                        |                                        | 3.54        | 0.71        | 17.76                                  |      | 2.88        | 0.38                    | 21.76       | 0.69        |
| Severe perineal lacerations (3 <sup>rd</sup> /4 <sup>th</sup> deg) <sup>a</sup> | Forceps                           |                                        | 20.5        | 18.5        | 22.6                                   |      | 24.6        | 19.8                    | 30.2        | -           |
|                                                                                 | Vacuum                            | 0.00                                   | 8.85        | 7.08        | 11.0                                   | 0.00 | 9.79        | 5.92                    | 15.8        | -           |
|                                                                                 | Sequential                        |                                        | 18.8        | 13.7        | 25.2                                   |      | 35.6        | 23.2                    | 50.2        | -           |

Adjusted for parity, pre-pregnancy weight, and infant birth weight.

Bold text denotes statistically significant differences between ARR in deliveries to infants with a fetal head in occiput anterior vs occiput posterior/transverse position at delivery.

<sup>a</sup> Rate (%) and 95% CI provided for severe perineal lacerations as relative estimates were not estimable due to small numbers in the reference group.

Table S6. Adjusted rate ratios (ARR) and 95% confidence intervals (CI) for perinatal and maternal outcomes following deliveries with dystocia by attempted midcavity operative vaginal delivery compared with caesarean delivery, stratified by prolonged second stage of labour, British Columbia, 2004–2014

| Outcome                                                             | Attempted midcavity instrument(s) | No prolonged second stage of labour<br>(n=1,787) |              |             | Prolonged second stage of labour<br>(n=3,270) |      |             |             |              |
|---------------------------------------------------------------------|-----------------------------------|--------------------------------------------------|--------------|-------------|-----------------------------------------------|------|-------------|-------------|--------------|
|                                                                     |                                   | Outcome rate in caesarean delivery (%)           | ARR          | 95% CI      | Outcome rate in caesarean delivery (%)        | ARR  | 95% CI      |             |              |
| Perinatal morbidity/mortality                                       | Forceps                           |                                                  | 2.70         | 1.23        | 5.92                                          |      | 2.36        | 0.98        | 5.69         |
|                                                                     | Vacuum                            | 1.24                                             | 2.92         | 1.15        | 7.41                                          | 0.56 | 3.60        | 1.27        | 10.23        |
|                                                                     | Sequential                        |                                                  | 2.66         | 0.57        | 12.49                                         |      | 7.77        | 2.40        | 25.21        |
| Birth trauma                                                        | Forceps                           |                                                  | 6.71         | 3.08        | 14.61                                         |      | 2.86        | 1.65        | 4.96         |
|                                                                     | Vacuum                            | 0.93                                             | 12.48        | 5.62        | 27.74                                         | 1.32 | 5.56        | 3.05        | 10.12        |
|                                                                     | Sequential                        |                                                  | 21.76        | 8.58        | 55.14                                         |      | 7.29        | 3.33        | 15.96        |
| Respiratory distress                                                | Forceps                           |                                                  | <b>2.88</b>  | <b>1.56</b> | <b>5.32</b>                                   |      | <b>1.06</b> | <b>0.67</b> | <b>1.66</b>  |
|                                                                     | Vacuum                            | 1.96                                             | 1.74         | 0.74        | 4.09                                          | 2.85 | 1.99        | 1.19        | 3.34         |
|                                                                     | Sequential                        |                                                  | 3.09         | 1.00        | 9.58                                          |      | 1.43        | 0.55        | 3.72         |
| Maternal morbidity                                                  | Forceps                           |                                                  | 1.70         | 0.56        | 5.18                                          |      | 1.56        | 0.72        | 3.39         |
|                                                                     | Vacuum                            | 0.72                                             | 1.74         | 0.43        | 7.01                                          | 0.83 | 2.16        | 0.83        | 5.64         |
|                                                                     | Sequential                        |                                                  | 2.20         | 0.25        | 19.45                                         |      | 1.35        | 0.17        | 10.73        |
| Postpartum haemorrhage                                              | Forceps                           |                                                  | 5.61         | 3.72        | 8.45                                          |      | 5.80        | 4.41        | 7.64         |
|                                                                     | Vacuum                            | 4.03                                             | 3.88         | 2.35        | 6.39                                          | 5.01 | 3.39        | 2.36        | 4.87         |
|                                                                     | Sequential                        |                                                  | 5.68         | 2.84        | 11.36                                         |      | 4.18        | 2.47        | 7.06         |
| Obstetric trauma                                                    | Forceps                           |                                                  | <b>14.36</b> | <b>9.28</b> | <b>22.23</b>                                  |      | <b>7.68</b> | <b>5.78</b> | <b>10.20</b> |
|                                                                     | Vacuum                            | 2.90                                             | 3.51         | 1.97        | 6.27                                          | 4.45 | 3.36        | 2.30        | 4.91         |
|                                                                     | Sequential                        |                                                  | <b>14.35</b> | <b>7.47</b> | <b>27.57</b>                                  |      | <b>5.50</b> | <b>3.29</b> | <b>9.18</b>  |
| Severe perineal lacerations (3 <sup>rd</sup> /4 <sup>th</sup> deg)* | Forceps                           |                                                  | 24.64        | 21.02       | 28.66                                         |      | 22.34       | 20.14       | 24.70        |
|                                                                     | Vacuum                            | 0.00                                             | 7.75         | 5.07        | 11.67                                         | 0.00 | 11.81       | 9.09        | 15.19        |
|                                                                     | Sequential                        |                                                  | 24.00        | 15.75       | 34.78                                         |      | 19.35       | 13.37       | 27.19        |

Adjusted for maternal age, parity, pre-pregnancy weight, infant birth weight, income quintile and year of birth. Bold text denotes statistically significant differences between ARR with and without prolonged second stage of labour.

\*Rate (%) and 95% CI provided for severe perineal lacerations as relative estimates were not estimable due to low rate in the reference group.



Table S7. Adjusted rate ratios (ARR) and 95% confidence intervals (CI) for perinatal and maternal outcomes following deliveries with fetal distress by attempted midcavity operative vaginal delivery compared with caesarean delivery, stratified by prolonged second stage of labour, British Columbia, 2004–2014

| Outcome                                                             | Attempted midcavity instrument(s) | No prolonged second stage of labour<br>(n=3,891) |             |             | Prolonged second stage of labour<br>(n=1,953) |      |             |             |             |
|---------------------------------------------------------------------|-----------------------------------|--------------------------------------------------|-------------|-------------|-----------------------------------------------|------|-------------|-------------|-------------|
|                                                                     |                                   | Outcome rate in caesarean delivery (%)           | ARR         | 95% CI      | Outcome rate in caesarean delivery (%)        | ARR  | 95% CI      |             |             |
| Perinatal morbidity/mortality                                       | Forceps                           |                                                  | 1.47        | 0.86        | 2.52                                          |      | 1.48        | 0.78        | 2.81        |
|                                                                     | Vacuum                            | 1.78                                             | 1.24        | 0.67        | 2.31                                          | 2.03 | 2.58        | 1.17        | 5.69        |
|                                                                     | Sequential                        |                                                  | 0.82        | 0.24        | 2.78                                          |      | 2.07        | 0.58        | 7.44        |
| Birth trauma                                                        | Forceps                           |                                                  | 2.58        | 1.56        | 4.25                                          |      | 2.86        | 1.58        | 5.17        |
|                                                                     | Vacuum                            | 1.78                                             | 3.66        | 2.18        | 6.13                                          | 1.92 | 2.42        | 1.09        | 5.37        |
|                                                                     | Sequential                        |                                                  | 5.32        | 2.71        | 10.43                                         |      | 8.17        | 3.55        | 18.77       |
| Respiratory distress                                                | Forceps                           |                                                  | 1.09        | 0.80        | 1.47                                          |      | 1.08        | 0.74        | 1.56        |
|                                                                     | Vacuum                            | 6.89                                             | <b>0.78</b> | <b>0.53</b> | <b>1.13</b>                                   | 7.46 | <b>1.86</b> | <b>1.19</b> | <b>2.93</b> |
|                                                                     | Sequential                        |                                                  | 1.22        | 0.69        | 2.14                                          |      | 1.73        | 0.84        | 3.55        |
| Maternal morbidity                                                  | Forceps                           |                                                  | <b>5.58</b> | <b>1.94</b> | <b>16.06</b>                                  |      | <b>0.86</b> | <b>0.32</b> | <b>2.29</b> |
|                                                                     | Vacuum                            | 0.32                                             | 1.95        | 0.54        | 7.04                                          | 1.13 | 0.35        | 0.04        | 2.75        |
|                                                                     | Sequential                        |                                                  | 5.92        | 1.45        | 24.11                                         |      | 1.05        | 0.13        | 8.60        |
| Postpartum haemorrhage                                              | Forceps                           |                                                  | 5.91        | 4.30        | 8.12                                          |      | 4.11        | 2.97        | 5.68        |
|                                                                     | Vacuum                            | 3.97                                             | <b>3.89</b> | <b>2.74</b> | <b>5.53</b>                                   | 6.55 | <b>1.87</b> | <b>1.16</b> | <b>3.02</b> |
|                                                                     | Sequential                        |                                                  | 4.52        | 2.79        | 7.32                                          |      | 4.84        | 2.69        | 8.70        |
| Obstetric trauma                                                    | Forceps                           |                                                  | 7.92        | 5.78        | 10.86                                         |      | 5.36        | 3.86        | 7.45        |
|                                                                     | Vacuum                            | 3.89                                             | 2.89        | 2.00        | 4.17                                          | 5.99 | 2.25        | 1.39        | 3.62        |
|                                                                     | Sequential                        |                                                  | 9.66        | 6.29        | 14.83                                         |      | 5.44        | 3.00        | 9.87        |
| Severe perineal lacerations (3 <sup>rd</sup> /4 <sup>th</sup> deg)* | Forceps                           |                                                  | 19.81       | 17.86       | 21.92                                         |      | 19.84       | 17.12       | 22.87       |
|                                                                     | Vacuum                            | 0.00                                             | 8.25        | 6.68        | 10.15                                         | 0.00 | 9.49        | 6.46        | 13.73       |
|                                                                     | Sequential                        |                                                  | 22.60       | 17.44       | 28.75                                         |      | 20.25       | 12.87       | 30.40       |

Adjusted for maternal age, parity, pre-pregnancy weight, infant birth weight, income quintile and year of birth.

Bold text denotes statistically significant differences between ARR with and without prolonged second stage of labour.

\*Rate (%) and 95% CI provided for severe perineal lacerations as relative estimates were not estimable due to low rate in the reference group.
